# Supplementary material for: Distinct mechanisms of resistance to fulvestrant treatment dictate level of ER independence and selective response to CDK inhibitors in metastatic breast cancer
Source: PubMed Central journal article supplement (PMC7893923; doi:10.1186/s13058-021-01402-1), 2021-02-18

**A****TIME TO DEVELOPE RESISTANCE**

|                | Weeks to resistance |
|----------------|---------------------|
| <b>CAMA-1</b>  | 11                  |
| <b>MCF7</b>    | 28                  |
| <b>HCC1428</b> | 25                  |
| <b>ZR-75-1</b> | 9                   |
| <b>T47D</b>    | 40                  |
| <b>EFM-19</b>  | 14                  |

**C****IC50 VALUES FULVESTRANT**

|                | Parental | FR     | p-value |
|----------------|----------|--------|---------|
| <b>CAMA-1</b>  | 21 pM    | 4.9 μM | <0.0001 |
| <b>MCF7</b>    | 351 pM   | 2.9 μM | <0.0001 |
| <b>HCC1428</b> | 2.2 nM   | 9.6 nM | <0.0001 |
| <b>ZR-75-1</b> | 212 pM   | 6.2 μM | <0.0001 |
| <b>T47D</b>    | 0.3 pM   | 6.7 μM | <0.0001 |
| <b>EFM-19</b>  | 183 pM   | 2.3 μM | <0.0001 |

**B**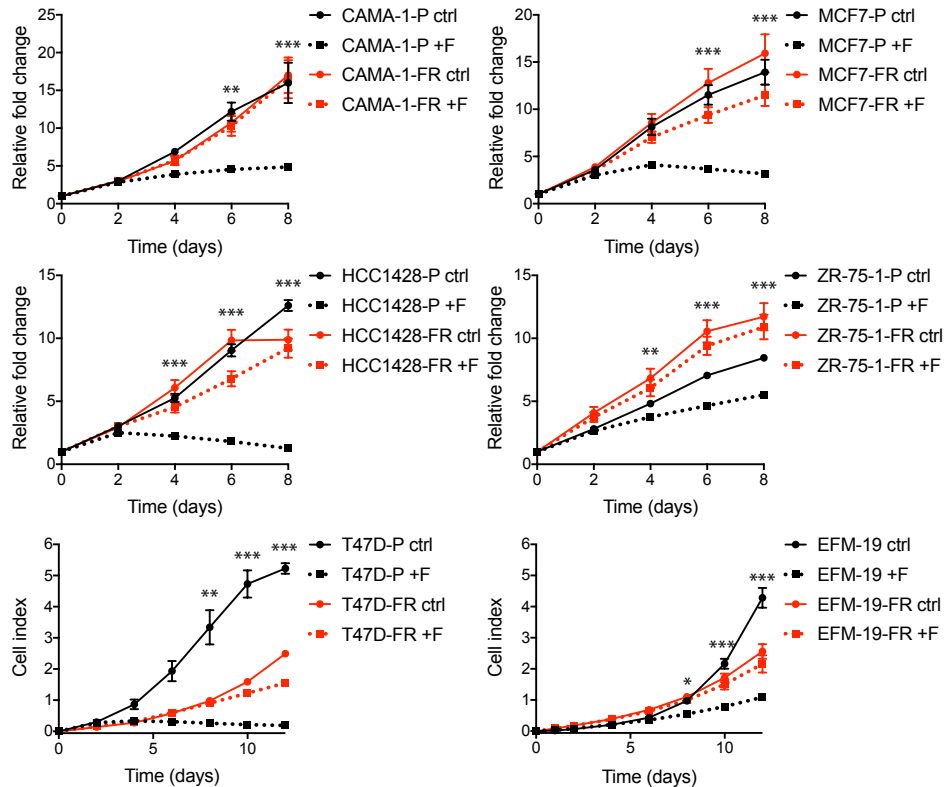**D**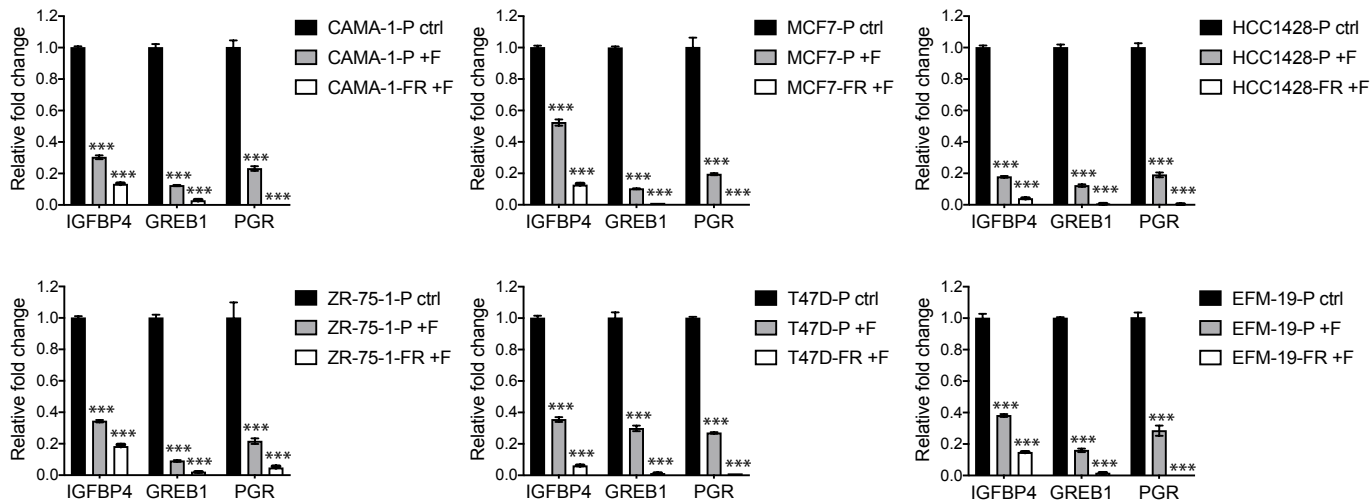**E**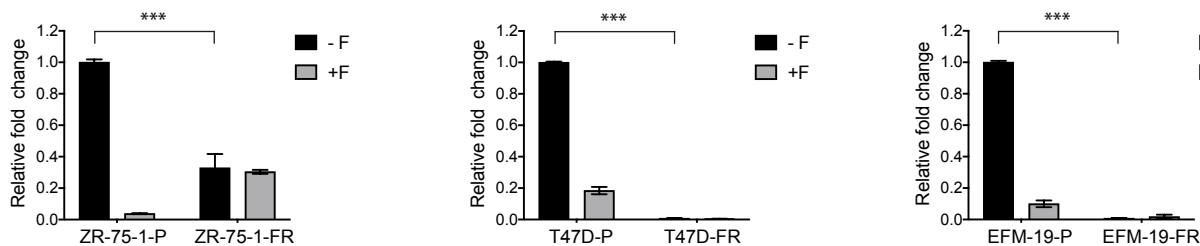**F**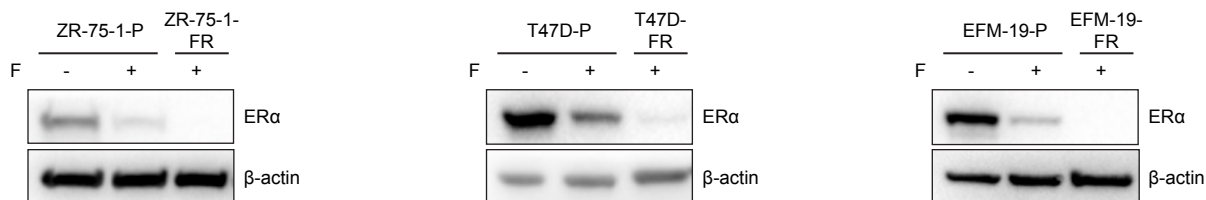

Supplement: 13058_2021_1402_MOESM3_ESM.pdf [file 13058_2021_1402_MOESM3_ESM.pdf]
