# Supplementary material for: Distinct mechanisms of resistance to fulvestrant treatment dictate level of ER independence and selective response to CDK inhibitors in metastatic breast cancer
Source: PubMed Central journal article supplement (PMC7893923; doi:10.1186/s13058-021-01402-1), 2021-02-18

**A**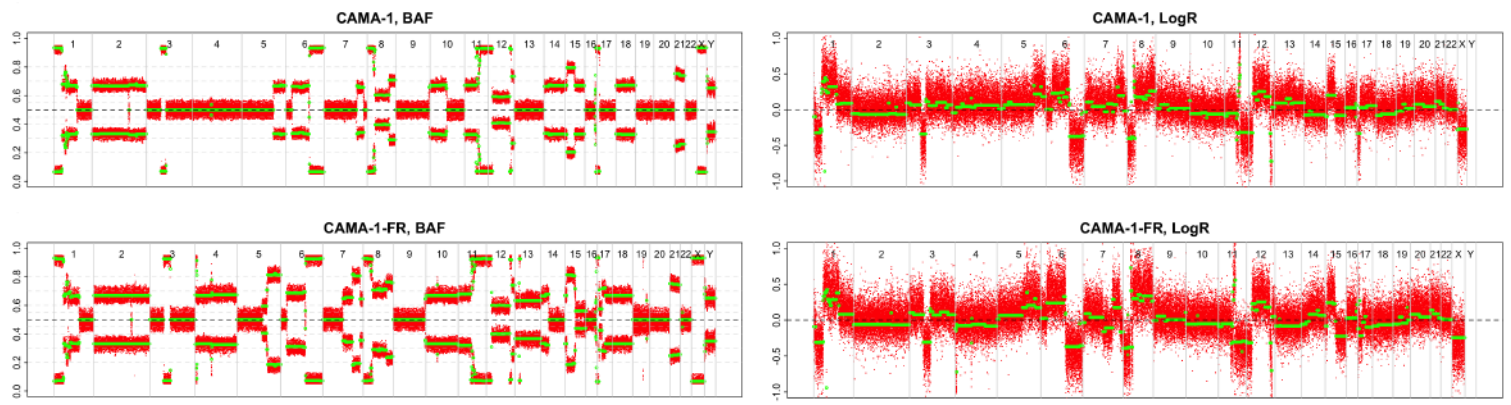**B**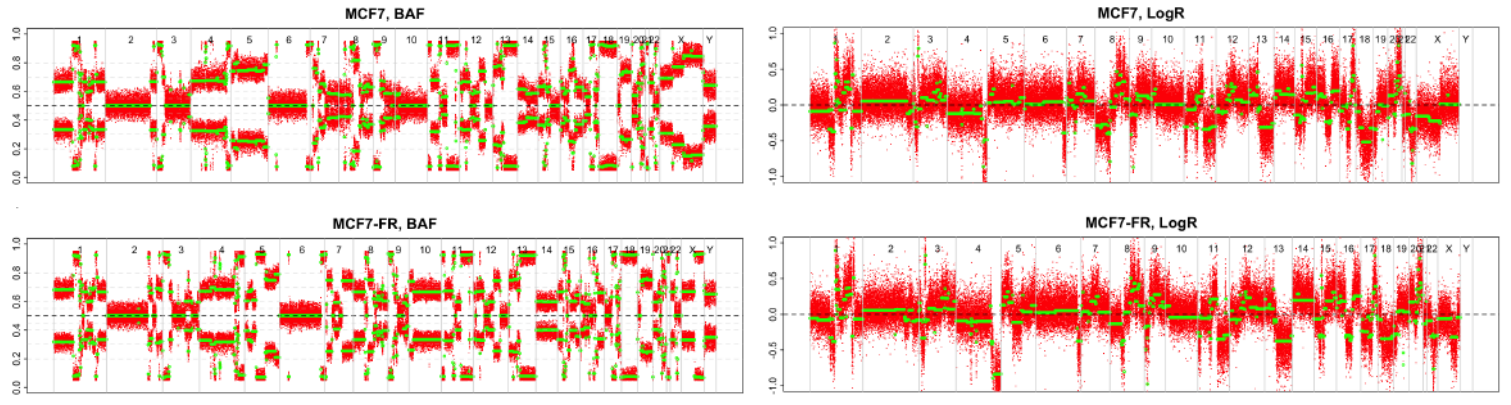**C**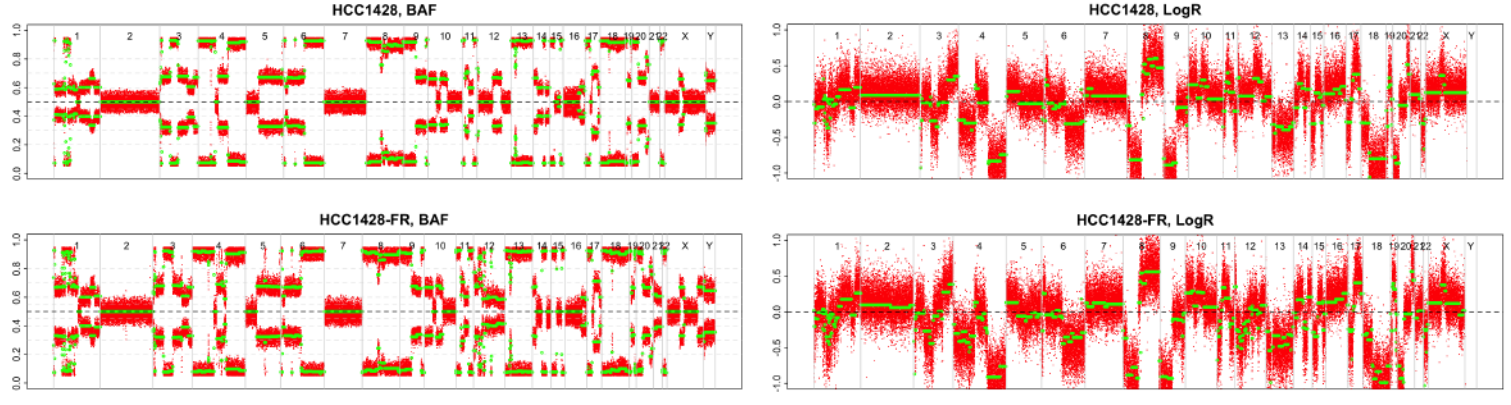**D**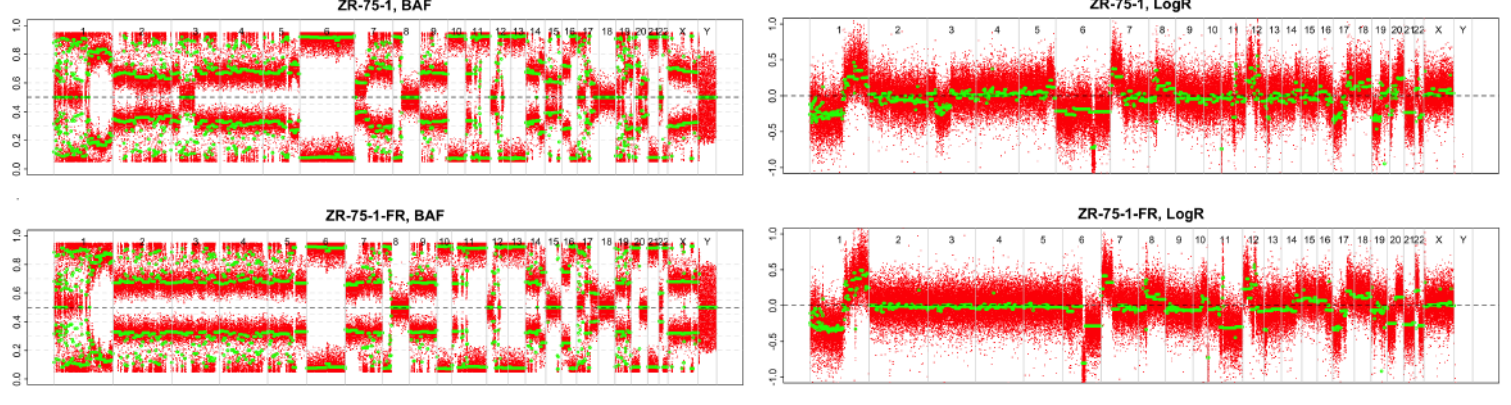

**E**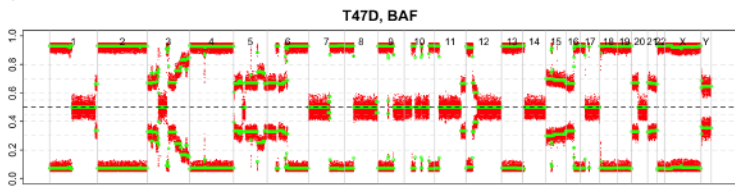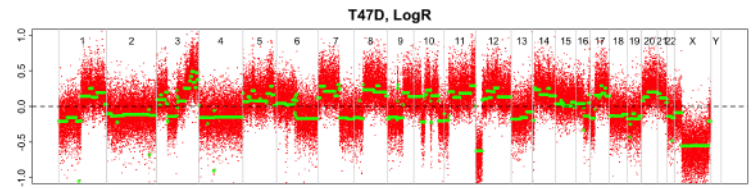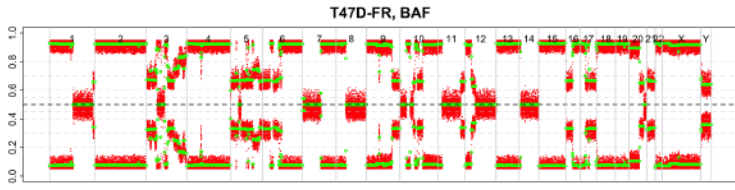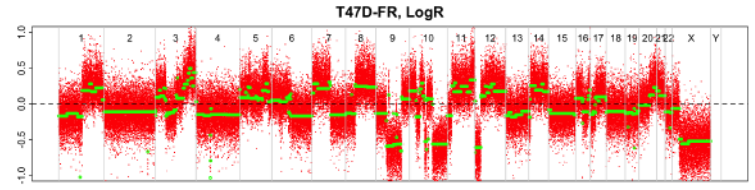**F**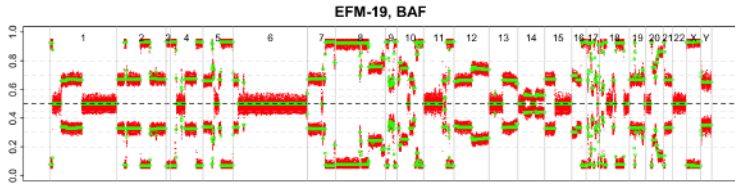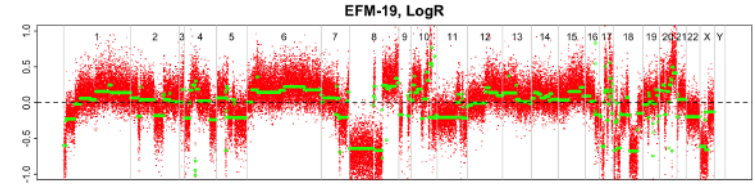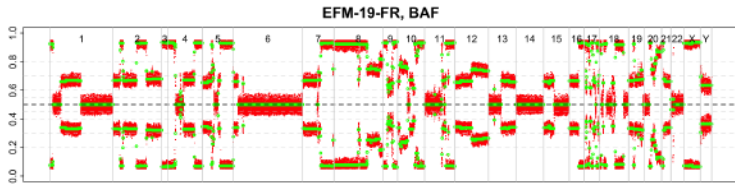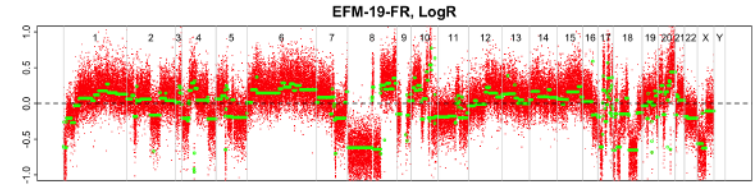

Supplement: 13058_2021_1402_MOESM7_ESM.pdf [file 13058_2021_1402_MOESM7_ESM.pdf]
