# Supplementary material for: Distinct mechanisms of resistance to fulvestrant treatment dictate level of ER independence and selective response to CDK inhibitors in metastatic breast cancer
Source: PubMed Central journal article supplement (PMC7893923; doi:10.1186/s13058-021-01402-1), 2021-02-18
Supplement: 13058_2021_1402_MOESM8_ESM.pdf [file 13058_2021_1402_MOESM8_ESM.pdf]

Common processes enriched in fulvestrant-resistant CAMA-1, MCF7 and T47D identified by DAVID bioinformatics tool.

| <b>Enriched gene ontology function for correlated genes</b> |                                   |              |            |                |                  |
|-------------------------------------------------------------|-----------------------------------|--------------|------------|----------------|------------------|
| <b>Annotation cluster 1**</b>                               | <b>Enrichment score: 22.9</b>     |              |            |                |                  |
| <b>Category</b>                                             | <b>Term</b>                       | <b>Count</b> | <b>% *</b> | <b>p-value</b> | <b>Benjamini</b> |
| UP_KEYWORDS                                                 | Cell cycle                        | 47           | 33.6       | 1.8E-34        | 3.0E-32          |
| UP_KEYWORDS                                                 | Cell division                     | 32           | 22.9       | 1.4E-24        | 7.5E-23          |
| GOTERM_BP_DIRECT                                            | cell division                     | 31           | 22.1       | 2.5E-23        | 7.0E-21          |
| UP_KEYWORDS                                                 | Mitosis                           | 25           | 17.9       | 1.6E-20        | 4.3E-19          |
| GOTERM_BP_DIRECT                                            | mitotic nuclear division          | 21           | 15.0       | 3.3E-15        | 3.7E-13          |
|                                                             |                                   |              |            |                |                  |
| <b>Annotation Cluster 2**</b>                               | <b>Enrichment Score: 10.69</b>    |              |            |                |                  |
| <b>Category</b>                                             | <b>Term</b>                       | <b>Count</b> | <b>% *</b> | <b>p-value</b> | <b>Benjamini</b> |
| GOTERM_BP_DIRECT                                            | DNA repair                        | 19           | 13.6       | 2.1E-13        | 2.0E-11          |
| UP_KEYWORDS                                                 | DNA damage                        | 19           | 13.6       | 2.9E-11        | 4.3E-10          |
| UP_KEYWORDS                                                 | DNA repair                        | 16           | 11.4       | 1.4E-9         | 1.7E-8           |
|                                                             |                                   |              |            |                |                  |
| <b>Annotation Cluster 3**</b>                               | <b>Enrichment Score: 9.58</b>     |              |            |                |                  |
| <b>Category</b>                                             | <b>Term</b>                       | <b>Count</b> | <b>% *</b> | <b>p-value</b> | <b>Benjamini</b> |
| UP_KEYWORDS                                                 | Chromosome                        | 24           | 17.1       | 3.3E-15        | 7.6E-14          |
| UP_KEYWORDS                                                 | Centromere                        | 14           | 10.0       | 9.0E-12        | 1.5E-10          |
| GOTERM_BP_DIRECT                                            | sister chromatid cohesion         | 13           | 9.3        | 1.9E-11        | 1.6E-9           |
| GOTERM_CC_DIRECT                                            | condensed chromosome kinetochore  | 10           | 7.1        | 1.3E-8         | 3.8E-7           |
| UP_KEYWORDS                                                 | Kinetochore                       | 10           | 7.1        | 2.3E-8         | 2.6E-7           |
| GOTERM_CC_DIRECT                                            | kinetochore                       | 8            | 5.7        | 2.0E-6         | 4.3E-5           |
|                                                             |                                   |              |            |                |                  |
| <b>Enriched KEGG pathways for correlated genes***</b>       |                                   |              |            |                |                  |
| <b>Category</b>                                             | <b>Term</b>                       | <b>Count</b> | <b>% *</b> | <b>p-value</b> | <b>Benjamini</b> |
| KEGG_PATHWAY                                                | DNA replication                   | 15           | 10.7       | 1.3E-21        | 8.7E-20          |
| KEGG_PATHWAY                                                | Cell cycle                        | 18           | 12.9       | 1.2E-17        | 4.3E-16          |
| KEGG_PATHWAY                                                | Mismatch repair                   | 6            | 4.3        | 6.6E-7         | 1.5E-5           |
| KEGG_PATHWAY                                                | Base excision repair              | 6            | 4.3        | 4.4E-6         | 7.6E-5           |
| KEGG_PATHWAY                                                | Pyrimidine metabolism             | 8            | 5.7        | 1.2E-5         | 1.7E-4           |
| KEGG_PATHWAY                                                | Nucleotide excision repair        | 6            | 4.3        | 2.6E-5         | 3.0E-4           |
| KEGG_PATHWAY                                                | p53 signaling pathway             | 6            | 4.3        | 1.5E-4         | 1.5E-3           |
| KEGG_PATHWAY                                                | Fanconi anemia pathway            | 5            | 3.6        | 6.8E-4         | 5.9E-3           |
| KEGG_PATHWAY                                                | Purine metabolism                 | 7            | 5.0        | 2.1E-3         | 1.6E-2           |
| KEGG_PATHWAY                                                | Small cell lung cancer            | 5            | 3.6        | 3.9E-3         | 2.7E-2           |
|                                                             |                                   |              |            |                |                  |
| <b>Enriched BIOCARTA pathways for correlated genes****</b>  |                                   |              |            |                |                  |
| <b>Category</b>                                             | <b>Term</b>                       | <b>Count</b> | <b>% *</b> | <b>p-value</b> | <b>Benjamini</b> |
| BIOCARTA                                                    | CDK Regulation of DNA Replication | 9            | 6.4        | 7.4E-11        | 2.8E-9           |
| BIOCARTA                                                    | Cyclins and Cell Cycle Regulation | 5            | 3.6        | 6.0E-4         | 1.1E-2           |

\* Gene list of regulated genes that follow the analysed pattern contains 160 significant genes, out of which 140 genes were recognised by DAVID and used in the % calculation.

\*\* 24 annotation clusters were identified using standard settings, the three most enriched annotation clusters are included.

\*\*\* KEGG pathway analysis yielded 19 chart records, entries with Benjamini  $\leq 0.05$  are included.

\*\*\*\* BIOCARTA analysis yielded seven chart entries, entries with Benjamini  $\leq 0.05$  are included.

DAVID functional categories and gene ontology (GO) functions as well as KEGG and Biocarta pathways for genes commonly downregulated upon fulvestrant treatment in parental cells and then upregulated again upon development of resistance.

Common processes enriched in fulvestrant-resistant HCC1428 identified by DAVID bioinformatics tool.

| <b>Enriched gene ontology function for correlated genes</b> |                                                         |                                |            |                |                  |
|-------------------------------------------------------------|---------------------------------------------------------|--------------------------------|------------|----------------|------------------|
| <b>Annotation cluster 1**</b>                               |                                                         | <b>Enrichment score: 19.6</b>  |            |                |                  |
| <b>Category</b>                                             | <b>Term</b>                                             | <b>Count</b>                   | <b>% *</b> | <b>p-value</b> | <b>Benjamini</b> |
| UP_KEYWORDS                                                 | DNA replication                                         | 38                             | 7.7        | 6.6E-37        | 2.1E-34          |
| GOTERM_BP_DIRECT                                            | DNA replication                                         | 42                             | 8.6        | 5.6E-31        | 8.6E-28          |
| GOTERM_BP_DIRECT                                            | DNA replication initiation                              | 17                             | 3.5        | 5.3E-18        | 4.1E-15          |
| GOTERM_BP_DIRECT                                            | G1/S transition of mitotic cell cycle                   | 25                             | 5.1        | 2.6E-17        | 1.3E-14          |
|                                                             |                                                         |                                |            |                |                  |
| <b>Annotation Cluster 2**</b>                               |                                                         | <b>Enrichment Score: 10.73</b> |            |                |                  |
| <b>Category</b>                                             | <b>Term</b>                                             | <b>Count</b>                   | <b>% *</b> | <b>p-value</b> | <b>Benjamini</b> |
| UP_KEYWORDS                                                 | DNA damage                                              | 36                             | 7.3        | 1.0E-13        | 6.6E-12          |
| UP_KEYWORDS                                                 | DNA repair                                              | 30                             | 6.1        | 1.6E-11        | 8.5E-10          |
| GOTERM_BP_DIRECT                                            | DNA repair                                              | 25                             | 5.1        | 3.9E-9         | 7.5E-7           |
|                                                             |                                                         |                                |            |                |                  |
| <b>Annotation Cluster 3**</b>                               |                                                         | <b>Enrichment Score: 8.86</b>  |            |                |                  |
| <b>Category</b>                                             | <b>Term</b>                                             | <b>Count</b>                   | <b>% *</b> | <b>p-value</b> | <b>Benjamini</b> |
| GOTERM_BP_DIRECT                                            | DNA synthesis involved in DNA repair                    | 14                             | 2.9        | 8.8E-13        | 2.3E-10          |
| GOTERM_BP_DIRECT                                            | strand displacement                                     | 11                             | 2.2        | 2.7E-10        | 5.9E-8           |
| GOTERM_BP_DIRECT                                            | regulation of signal transduction by p53 class mediator | 14                             | 2.9        | 1.1E-5         | 1.5E-3           |
|                                                             |                                                         |                                |            |                |                  |
| <b>Enriched KEGG pathways for correlated genes***</b>       |                                                         |                                |            |                |                  |
| <b>Category</b>                                             | <b>Term</b>                                             | <b>Count</b>                   | <b>% *</b> | <b>p-value</b> | <b>Benjamini</b> |
| KEGG_PATHWAY                                                | DNA replication                                         | 19                             | 3.9        | 2.6E-20        | 5.1E-18          |
| KEGG_PATHWAY                                                | Purine metabolism                                       | 23                             | 4.7        | 2.2E-10        | 2.2E-8           |
| KEGG_PATHWAY                                                | Cell cycle                                              | 19                             | 3.9        | 9.3E-10        | 6.1E-8           |
| KEGG_PATHWAY                                                | Fanconi anemia pathway                                  | 13                             | 2.6        | 3.6E-9         | 1.8E-7           |
| KEGG_PATHWAY                                                | Pyrimidine metabolism                                   | 16                             | 3.3        | 1.8E-8         | 7.2E-7           |
| KEGG_PATHWAY                                                | Homologous recombination                                | 8                              | 1.6        | 4.7E-6         | 1.5E-4           |
| KEGG_PATHWAY                                                | Base excision repair                                    | 8                              | 1.6        | 1.2E-5         | 3.3E-4           |
| KEGG_PATHWAY                                                | Mismatch repair                                         | 7                              | 1.4        | 1.4E-5         | 3.5E-4           |
| KEGG_PATHWAY                                                | Nucleotide excision repair                              | 8                              | 1.6        | 1.3E-4         | 2.8E-3           |
|                                                             |                                                         |                                |            |                |                  |
| <b>Enriched BIOCARTA pathways for correlated genes****</b>  |                                                         |                                |            |                |                  |
| <b>Category</b>                                             | <b>Term</b>                                             | <b>Count</b>                   | <b>% *</b> | <b>p-value</b> | <b>Benjamini</b> |
| BIOCARTA                                                    | CDK Regulation of DNA Replication                       | 9                              | 1.8        | 5.4E-9         | 4.8E-7           |
| BIOCARTA                                                    | Role of BRCA1, BRCA2 and ATR in Cancer Susceptibility   | 7                              | 1.4        | 1.5E-5         | 6.7E-4           |
| BIOCARTA                                                    | BRCA1-dependent Ub-ligase activity                      | 4                              | 0.8        | 9.4E-4         | 2.8E-2           |

\* Gene list of regulated genes that follow the analysed pattern contains 533 significant genes, out of which 491 genes were recognised by DAVID and used in the % calculation.

\*\* 75 annotation clusters were identified using standard settings, the three most enriched annotation clusters are included.

\*\*\* KEGG pathway analysis yielded 14 chart records, entries with Benjamini  $\leq 0.05$  are included.

\*\*\*\* BIOCARTA analysis yielded five chart entries, entries with Benjamini  $\leq 0.05$  are included.

DAVID functional categories and gene ontology (GO) functions as well as KEGG and Biocarta pathways for genes commonly downregulated upon fulvestrant treatment in parental cells and then upregulated again upon development of resistance.
