# Supplementary material for: Distinct mechanisms of resistance to fulvestrant treatment dictate level of ER independence and selective response to CDK inhibitors in metastatic breast cancer
Source: PubMed Central journal article supplement (PMC7893923; doi:10.1186/s13058-021-01402-1), 2021-02-18
Supplement: 13058_2021_1402_MOESM9_ESM.pdf [file 13058_2021_1402_MOESM9_ESM.pdf]

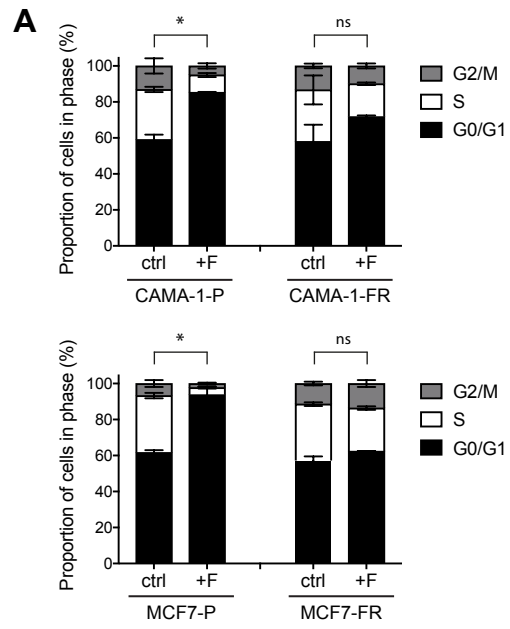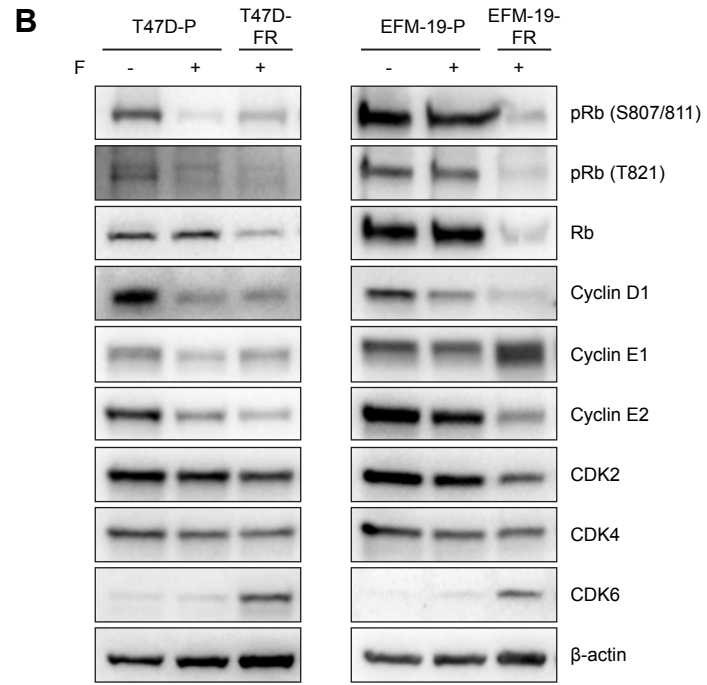

**C** IC50 VALUES PALBOCICLIB

|                | Parental | FR     | p-value |
|----------------|----------|--------|---------|
| <b>CAMA-1</b>  | 130 nM   | 511 nM | <0.0001 |
| <b>MCF7</b>    | 116 nM   | 134 nM | 0.477   |
| <b>HCC1428</b> | 446 nM   | 105 nM | <0.0001 |
| <b>ZR-75-1</b> | 200 nM   | 50 nM  | <0.0001 |
| <b>T47D</b>    | 79 nM    | 41 nM  | 0.038   |
| <b>EFM-19</b>  | 62 nM    | 22 nM  | 0.0001  |

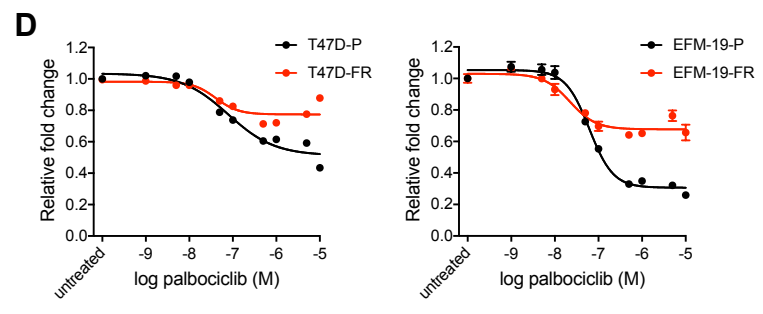

**E** IC50 VALUES CDK3i

|                | Parental | FR     | p-value |
|----------------|----------|--------|---------|
| <b>CAMA-1</b>  | 4 nM     | 15 nM  | <0.0001 |
| <b>MCF7</b>    | 26 nM    | 161 nM | <0.0001 |
| <b>HCC1428</b> | 156 nM   | 896 nM | <0.0001 |
| <b>ZR-75-1</b> | 111 nM   | 79 nM  | 0.006   |
| <b>T47D</b>    | 113 nM   | 763 nM | <0.0001 |
| <b>EFM-19</b>  | 22 nM    | 225 nM | <0.0001 |

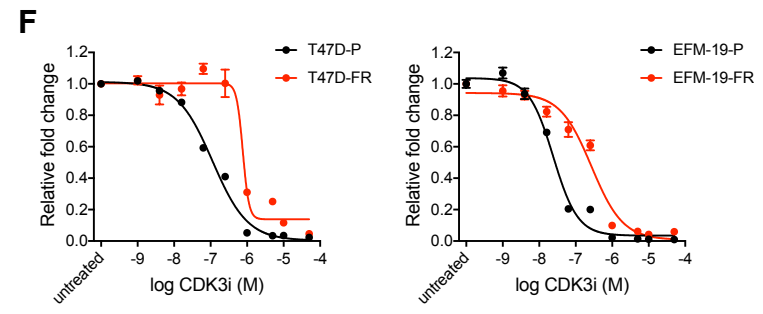

**G** TIME TO DEVELOPE PALBOCICLIB RESISTANCE

|                  | Weeks to resistance |
|------------------|---------------------|
| <b>CAMA-1</b>    | 20                  |
| <b>CAMA-1-FR</b> | 19                  |
| <b>MCF7</b>      | 11.5                |
| <b>MCF7-FR</b>   | 22                  |

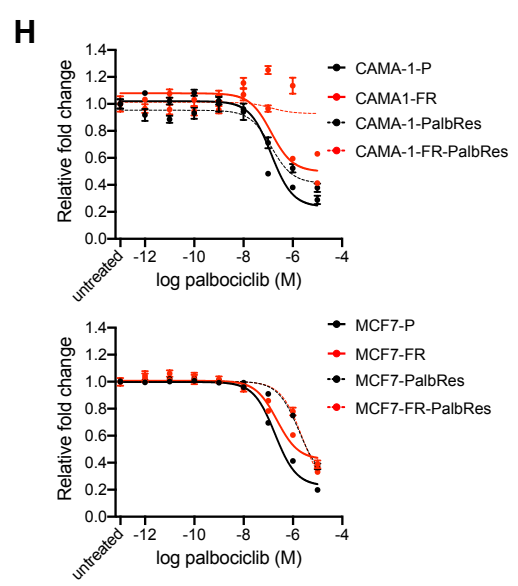

**I** IC50 VALUES PALBOCICLIB

|                          | IC50        | p-value              |
|--------------------------|-------------|----------------------|
| <b>CAMA-1-P</b>          | 43 nM       |                      |
| <b>CAMA-1-FR</b>         | 535 nM      | <0.0001              |
| <b>CAMA-1-PalbRes</b>    | 161 nM      | <0.0001              |
| <b>CAMA-1-FR-PalbRes</b> | >10 $\mu$ M | cannot be calculated |
| <b>MCF7-P</b>            | 187 nM      |                      |
| <b>MCF7-FR</b>           | 224 nM      | 0.5459               |
| <b>MCF7-PalbRes</b>      | 1.8 $\mu$ M | <0.0001              |
| <b>MCF7-FR-PalbRes</b>   | 2.4 $\mu$ M | <0.0001              |

**J** IC50 VALUES FULVESTRANT

|                          | IC50        | p-value |
|--------------------------|-------------|---------|
| <b>CAMA-1-P</b>          | 220 pM      |         |
| <b>CAMA-1-FR</b>         | 2.0 $\mu$ M | <0.0001 |
| <b>CAMA-1-PalbRes</b>    | 911 pM      | <0.0001 |
| <b>CAMA-1-FR-PalbRes</b> | 3.4 $\mu$ M | <0.0001 |
| <b>MCF7-P</b>            | 690 pM      |         |
| <b>MCF7-FR</b>           | 1.6 $\mu$ M | <0.0001 |
| <b>MCF7-PalbRes</b>      | 593 pM      | 0.4582  |
| <b>MCF7-FR-PalbRes</b>   | 1.6 $\mu$ M | 0.0001  |
