# Supplementary material for: Distinct mechanisms of resistance to fulvestrant treatment dictate level of ER independence and selective response to CDK inhibitors in metastatic breast cancer
Source: Springer Nature journal article supplement (doi:10.1186/s13058-021-01402-1), 2021-02-18
Supplement: MOESM2 [file 18879600]

Patient characteristics for patient samples pre and post fulvestrant treatment.

|                                        | PATIENT 1                        |                   | PATIENT 2                 |                  | PATIENT 3         |      |
|----------------------------------------|----------------------------------|-------------------|---------------------------|------------------|-------------------|------|
|                                        | pre                              | post              | pre                       | post             | pre               | post |
| <b>Biopsy site</b>                     | Breast primary tumour            | Skin locoregional | Breast inoperable disease | Breast           | Breast recurrence | Skin |
| <b>ER status*</b>                      | 40%                              | 15%               | 100%                      | 90%              | 100%              | 90%  |
| <b>PgR status*</b>                     | 40%                              | 0%                | 70%                       | 0%               | 80%               | 90%  |
| <b>HER2 status**</b>                   | 3+amplified                      | 3+ amplified      | 2+ non-amplified          | 2+ non-amplified | 1+                | 0/1+ |
| <b>Ki67 status*</b>                    | 36%                              | 50%               | 24%                       | 40%              | 38%               | 13%  |
| <b>Treatments prior to fulvestrant</b> | Letrozole, tamoxifen, exemestane |                   | Letrozole                 |                  | None              |      |

\* Percentage positive tumour cells for each marker

\*\* Scored according to ASCO/CAP guidelines
