# Supplementary material for: Distinct mechanisms of resistance to fulvestrant treatment dictate level of ER independence and selective response to CDK inhibitors in metastatic breast cancer
Source: Springer Nature journal article supplement (doi:10.1186/s13058-021-01402-1), 2021-02-18

**A**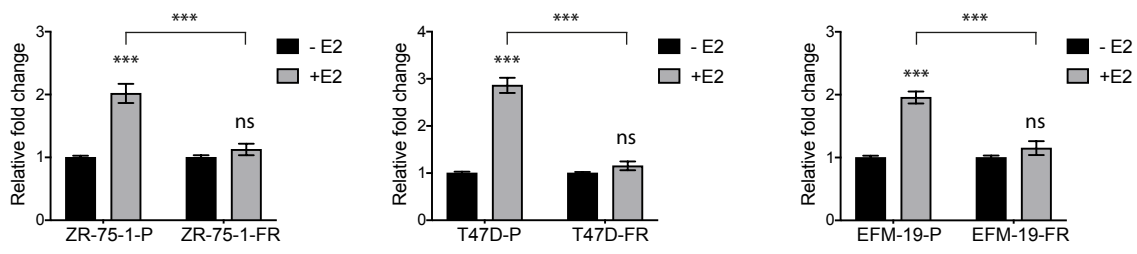**B**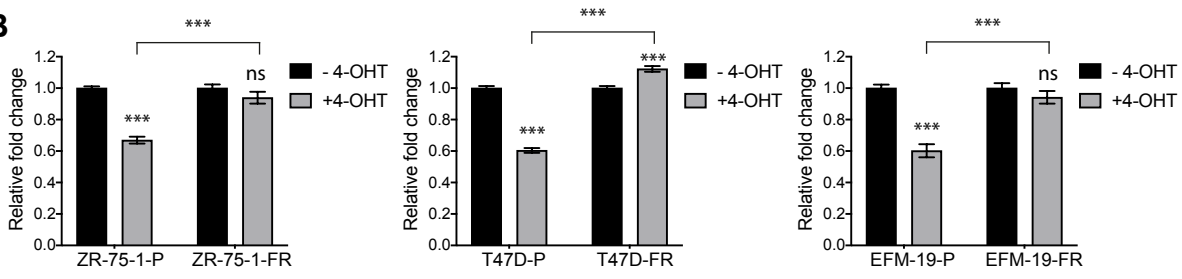

Supplement: MOESM6 [file 18879600]
